# Supplementary material for: Endogenous sex steroid hormones and colorectal cancer risk: a systematic review and meta-analysis
Source: PubMed Central journal article supplement (PMC8777537; doi:10.1007/s12672-021-00402-z), 2021-03-15
Supplement: 12672_2021_402_MOESM1_ESM.pdf [file 12672_2021_402_MOESM1_ESM.pdf]

**Supplemental Table 1.** PubMed and Scopus search strategies.

| <b>PubMed</b>                                                                                     |                                                                                                                                                                                                                                                                                                                                                                                                                                                             |
|---------------------------------------------------------------------------------------------------|-------------------------------------------------------------------------------------------------------------------------------------------------------------------------------------------------------------------------------------------------------------------------------------------------------------------------------------------------------------------------------------------------------------------------------------------------------------|
|                                                                                                   | Keywords for Sex hormones:                                                                                                                                                                                                                                                                                                                                                                                                                                  |
| # 1                                                                                               | (gonadal steroid hormones) OR (sex hormones) OR estrogens OR androgens OR (sex hormone binding globulin) OR shbg OR estradiol OR oestradiol OR testosterone                                                                                                                                                                                                                                                                                                 |
|                                                                                                   | MeSH terms for Sex hormones:                                                                                                                                                                                                                                                                                                                                                                                                                                |
| # 2                                                                                               | (Gonadal Steroid Hormones) OR Estrogens OR Androgens OR (Sex Hormone-Binding Globulin) OR Estradiol OR Testosterone                                                                                                                                                                                                                                                                                                                                         |
|                                                                                                   | Keywords for colorectum:                                                                                                                                                                                                                                                                                                                                                                                                                                    |
| # 3                                                                                               | (Colon OR Rectal OR Rectum OR Intestin* OR Colorectal OR CRC OR bowel OR gut)                                                                                                                                                                                                                                                                                                                                                                               |
|                                                                                                   | Keywords for cancer                                                                                                                                                                                                                                                                                                                                                                                                                                         |
| # 4                                                                                               | (cancer OR neoplasm OR neoplasms OR carcinoma OR tumour OR tumor OR malignan*)                                                                                                                                                                                                                                                                                                                                                                              |
|                                                                                                   | MeSH terms for colorectal cancer:                                                                                                                                                                                                                                                                                                                                                                                                                           |
| # 5                                                                                               | (Colorectal neoplasms) OR (Colonic Neoplasms) OR (Rectal Neoplasms) OR (Sigmoid Neoplasms)                                                                                                                                                                                                                                                                                                                                                                  |
| <b>(#1 OR #2) AND ((#3 AND #4) OR #5) AND english[Language] NOT review[PT] NOT animal[Filter]</b> |                                                                                                                                                                                                                                                                                                                                                                                                                                                             |
| <b>Scopus</b>                                                                                     |                                                                                                                                                                                                                                                                                                                                                                                                                                                             |
|                                                                                                   | TITLE-ABS((gonadal steroid hormones) OR (sex hormones) OR estrogens OR androgens OR (sex hormone binding globulin) OR shbg OR estradiol OR oestradiol OR testosterone) <b>AND</b> TITLE-ABS(Colon OR Rectal OR Rectum OR Intestine OR intestinal OR Colorectal OR CRC OR bowel OR gut) <b>AND</b> TITLE-ABS(cancer OR neoplasm OR neoplasms OR carcinoma OR tumour OR tumor OR malignancy OR malignant) <b>AND</b> DOCTYPE(ar) <b>AND</b> LANGUAGE(english) |

**Supplemental Table 2.** Quality assessment of the prospective cohort studies, based on the NEWCASTLE-OTTAWA scale.<sup>a</sup>

| <b>Study</b>        | <b>Representativeness of the Exposed Cohort</b> | <b>Selection of the Non-Exposed Cohort</b> | <b>Ascertainment of Exposure</b> | <b>Demonstration That Outcome of Interest Was Not Present at Start of Study</b> | <b>Comparability of Cohorts on the Basis of the Design or Analysis</b> | <b>Assessment of Outcome</b> | <b>Was Follow-Up Long Enough for Outcomes to Occur</b> | <b>Adequacy of Follow Up of Cohorts</b> |
|---------------------|-------------------------------------------------|--------------------------------------------|----------------------------------|---------------------------------------------------------------------------------|------------------------------------------------------------------------|------------------------------|--------------------------------------------------------|-----------------------------------------|
| Orsted, D. D., 2014 | *                                               | *                                          | *                                | *                                                                               |                                                                        | *                            | *                                                      | *                                       |
| Chan, Y. X., 2018   | *                                               | *                                          | *                                | *                                                                               | **                                                                     | *                            | *                                                      | *                                       |
| Chan, Y. X., 2017   | *                                               | *                                          | *                                | *                                                                               | **                                                                     | *                            | *                                                      | *                                       |
| Gunter, M. J., 2008 | *                                               | *                                          | *                                | *                                                                               | **                                                                     | *                            | *                                                      | *                                       |

<sup>a</sup>A study can be awarded a maximum of one star for each numbered item within the Selection and Outcome categories. A maximum of two stars can be given for Comparability

**Supplemental Table 3.** Quality assessment of the nested case-control studies, based on the NEWCASTLE-OTTAWA scale.<sup>a</sup>

| <b>Study</b>           | <b>Is the case definition adequate?</b> | <b>Representativeness of the cases</b> | <b>Selection of Controls</b> | <b>Definition of Controls</b> | <b>Comparability of cases and controls on the basis of the design or analysis</b> | <b>Ascertainment of exposure</b> | <b>Same method of ascertainment for cases and controls</b> | <b>Non-Response rate</b> |
|------------------------|-----------------------------------------|----------------------------------------|------------------------------|-------------------------------|-----------------------------------------------------------------------------------|----------------------------------|------------------------------------------------------------|--------------------------|
| Clendenen, T. V., 2009 | *                                       | *                                      | *                            | *                             | *                                                                                 | *                                | *                                                          | *                        |
| Murphy, N., 2015       | *                                       | *                                      | *                            | *                             | **                                                                                | *                                | *                                                          | *                        |
| Mori, N., 2019         | *                                       | *                                      | *                            | *                             | **                                                                                | *                                | *                                                          | *                        |
| Lin, J. H., 2013       | *                                       |                                        | *                            | *                             | **                                                                                | *                                | *                                                          | *                        |

<sup>a</sup>A study can be awarded a maximum of one star for each numbered item within the Selection and Exposure categories. A maximum of two stars can be given for Comparability

a. Testosterone

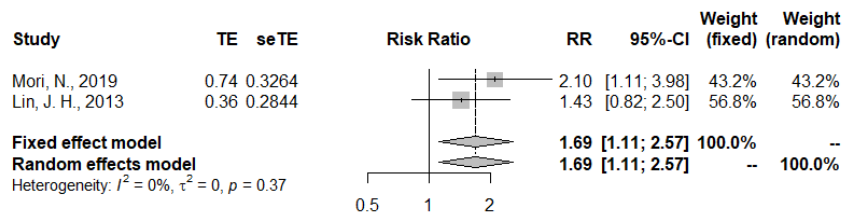

b. Estradiol

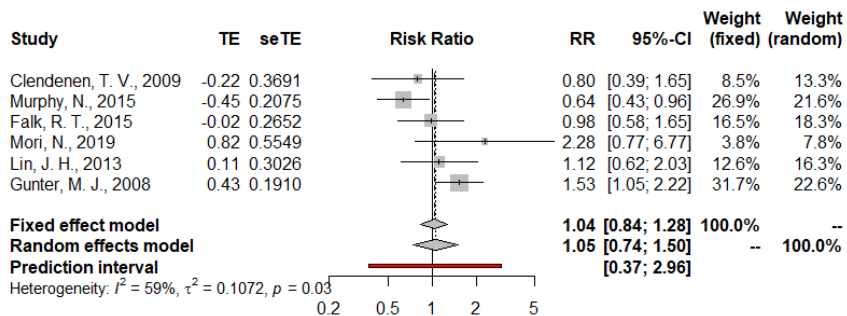

c. SHBG

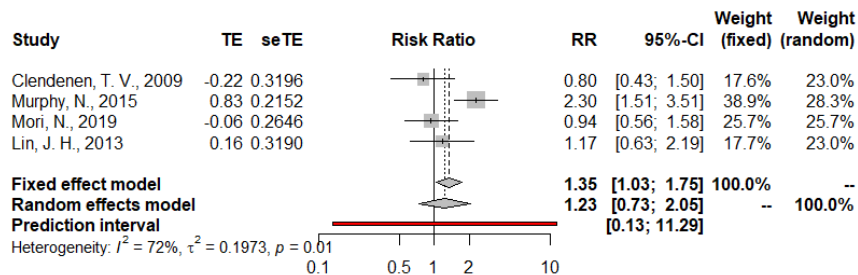

Supplementary Figure 1. Top versus bottom meta-analysed of the endogenous sex hormone concentrations.
